# Supplementary material for: Impact of Cytomegalovirus Infection and Genetic Background on the Frequencies of Peripheral Blood Suppressor Cells in Human Twins
Source: MDPI journal article supplement (doi:10.3390/pathogens10080963), 2021-07-30
Supplement: s1 [file s1]

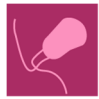**Table S1.** Characteristics of the study participants; 81 twin pairs, MZ (Monozygotic), DZ (same-sex Dizygotic).

|                     | All    | Concordant CMV Seronegative |       | Concordant CMV Seropositive |        | CMV Discordant |       |
|---------------------|--------|-----------------------------|-------|-----------------------------|--------|----------------|-------|
|                     |        | MZ                          | DZ    | MZ                          | DZ     | MZ             | DZ    |
| Pairs               | 81     | 8                           | 8     | 23                          | 21     | 11             | 10    |
| Gender <sup>1</sup> | 124/38 | 7F/1M                       | 7F/1M | 16F/7M                      | 17F/4M | 8F/3M          | 7F/3M |
| Median age in years | 48     | 44.5                        | 47    | 48                          | 49     | 44             | 58    |
| Age range           | 41–77  | 42–47                       | 44–72 | 41–70                       | 41–77  | 41–59          | 43–73 |

<sup>1</sup> F = female, M = male.**Table S2.** Impact of CMV-serostatus, age and gender on immune phenotypes.

| Immune Subset               | CMV- <sup>1</sup> | CMV+ <sup>1</sup> | ≤48 <sup>2</sup> | >48 <sup>2</sup> | Female | Male    |
|-----------------------------|-------------------|-------------------|------------------|------------------|--------|---------|
| CD25+                       | 2.9%              | 2.5% *            | 2.7%             | 2.4%             | 2.5%   | 3.0%    |
| FoxP3+                      | 3.6%              | 3.1%              | 3.1%             | 3.7% *           | 3.1%   | 3.6%    |
| CD25+FoxP3+                 | 2.9%              | 2.4%              | 2.4%             | 2.7% *           | 2.5%   | 2.5%    |
| Non suppressive Tregs       | 1.9%              | 1.6%              | 1.7%             | 1.7%             | 1.7%   | 1.5%    |
| CD25+FoxP3+Helios+          | 1.7%              | 1.4%              | 1.3%             | 1.7% **          | 1.4%   | 1.7%    |
| resting Tregs               | 0.5%              | 0.5%              | 0.5%             | 0.5%             | 0.5%   | 0.4%    |
| activated Tregs             | 2.1%              | 1.8%              | 1.8%             | 1.9%             | 1.8%   | 2.0%    |
| activated CD25+ Tregs       | 1.7%              | 1.5%              | 1.5%             | 1.7%             | 1.5%   | 1.8%    |
| FoxP3-Helios+               | 2.1%              | 2.0%              | 2.0%             | 2.0%             | 2.0%   | 2.3%    |
| FoxP3+Helios+               | 2.0%              | 1.7%              | 1.6%             | 2.1% **          | 1.7%   | 2.0%    |
| FoxP3+Helios-               | 1.8%              | 1.5% *            | 1.6%             | 1.7%             | 1.6%   | 1.5%    |
| CD45RA+CD45RO-              | 41.0%             | 37.8%             | 38.4%            | 38.4%            | 38.2%  | 38.8%   |
| CD45RA+CD45RO-FoxP3+Helios+ | 0.05%             | 0.05%             | 0.04%            | 0.07% ***        | 0.05%  | 0.05%   |
| CD45RA-CD45RO+FoxP3+Helios+ | 1.5%              | 1.4%              | 1.4%             | 1.6%             | 1.4%   | 1.8%    |
| CD8+FoxP3+                  | 0.5%              | 0.4%              | 0.5%             | 0.6%             | 0.5%   | 0.4%    |
| CD8+Helios+                 | 21.5%             | 17.0%             | 18.4%            | 16.4%            | 18.9%  | 12.7%   |
| CD14+                       | 14.9%             | 12.1%             | 12.2%            | 12.4%            | 12.2%  | 12.4%   |
| Lin-                        | 32.1%             | 26.8% *           | 27.4%            | 28.9%            | 28.0%  | 30.0%   |
| Lin-CD14-                   | 16.0%             | 14.4%             | 14.2%            | 16.1%            | 14.5%  | 15.4%   |
| Lin-CD14-CD15+              | 0.07%             | 0.06%             | 0.05%            | 0.06%            | 0.06%  | 0.07%   |
| Lin-CD14-CD15+CD11b+        | 0.06%             | 0.05%             | 0.06%            | 0.05%            | 0.05%  | 0.06%   |
| Lin-CD16-CD14+              | 14.1%             | 10.8%             | 11.2%            | 11.5%            | 11.3%  | 11.5%   |
| Lin-CD16-CD14+HLA-DR+       | 11.0%             | 9.4%              | 9.7%             | 9.9%             | 9.9%   | 9.9%    |
| Lin-CD16+CD14+              | 0.9%              | 0.8%              | 0.6%             | 0.9% *           | 0.9%   | 0.6%    |
| Lin-CD16+CD14+HLA-DR+       | 0.8%              | 0.8%              | 0.6%             | 0.9% *           | 0.8%   | 0.6%    |
| Lin-CD16+CD14low            | 9.9%              | 8.7%              | 7.9%             | 11.8% *          | 9.0%   | 8.8%    |
| Lin-CD16+CD14lowHLA-DR+     | 1.5%              | 1.6%              | 1.1%             | 2.0% **          | 1.5%   | 1.5%    |
| Lin-CD16-CD14-              | 5.3%              | 4.9%              | 5.4%             | 4.5%             | 4.7%   | 5.8% *  |
| Lin-CD14+HLA-DR-            | 1.4%              | 0.5% **           | 0.8%             | 0.9%             | 0.8%   | 0.4%    |
| Lin-CD14+HLA-DR+            | 11.7%             | 10.0%             | 10.3%            | 10.9%            | 10.4%  | 11.0%   |
| Lin-CD14-HLA-DR-            | 3.9%              | 3.5%              | 3.4%             | 3.9%             | 3.7%   | 3.1%    |
| Lin-CD14-HLA-DR+            | 12.3%             | 11.0%             | 10.5%            | 12.2%            | 10.9%  | 12.6% * |

<sup>1</sup> CMV- = CMV-seronegative, CMV+ = CMV-seropositive. <sup>2</sup> 48 years is the median, median frequencies displayed. Mann Whitney *p* values with \* *p* ≤ 0.05, \*\* *p* < 0.01, \*\*\* *p* < 0.001.

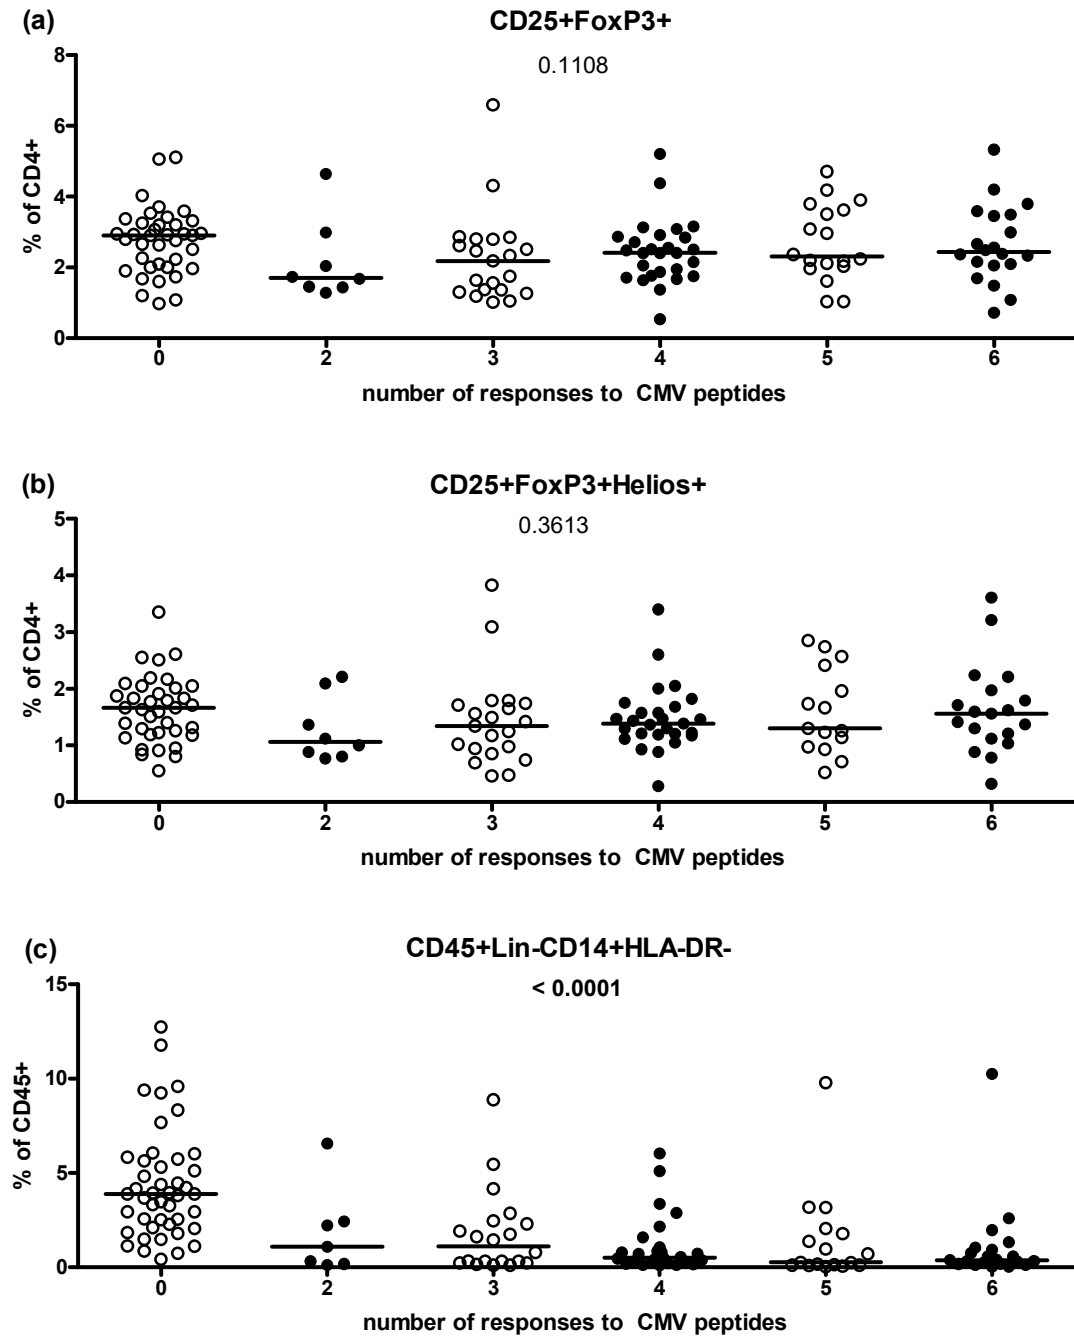

**Figure S1.** Frequencies of CD25+FoxP3+ (a), CD25+FoxP3+Helios+ (b) and CD14+HLA-DR- (c) suppressor cells within CMV-seronegative and CMV-seropositive twins grouped according to the number reactivities to the 6 CMV peptides investigated (IE-1, p150, CM2, p65, gB-1, gB-2). Borderline responses were considered negative. *P* values are shown for Kruskal-Wallis test and horizontal bars represent the medians.

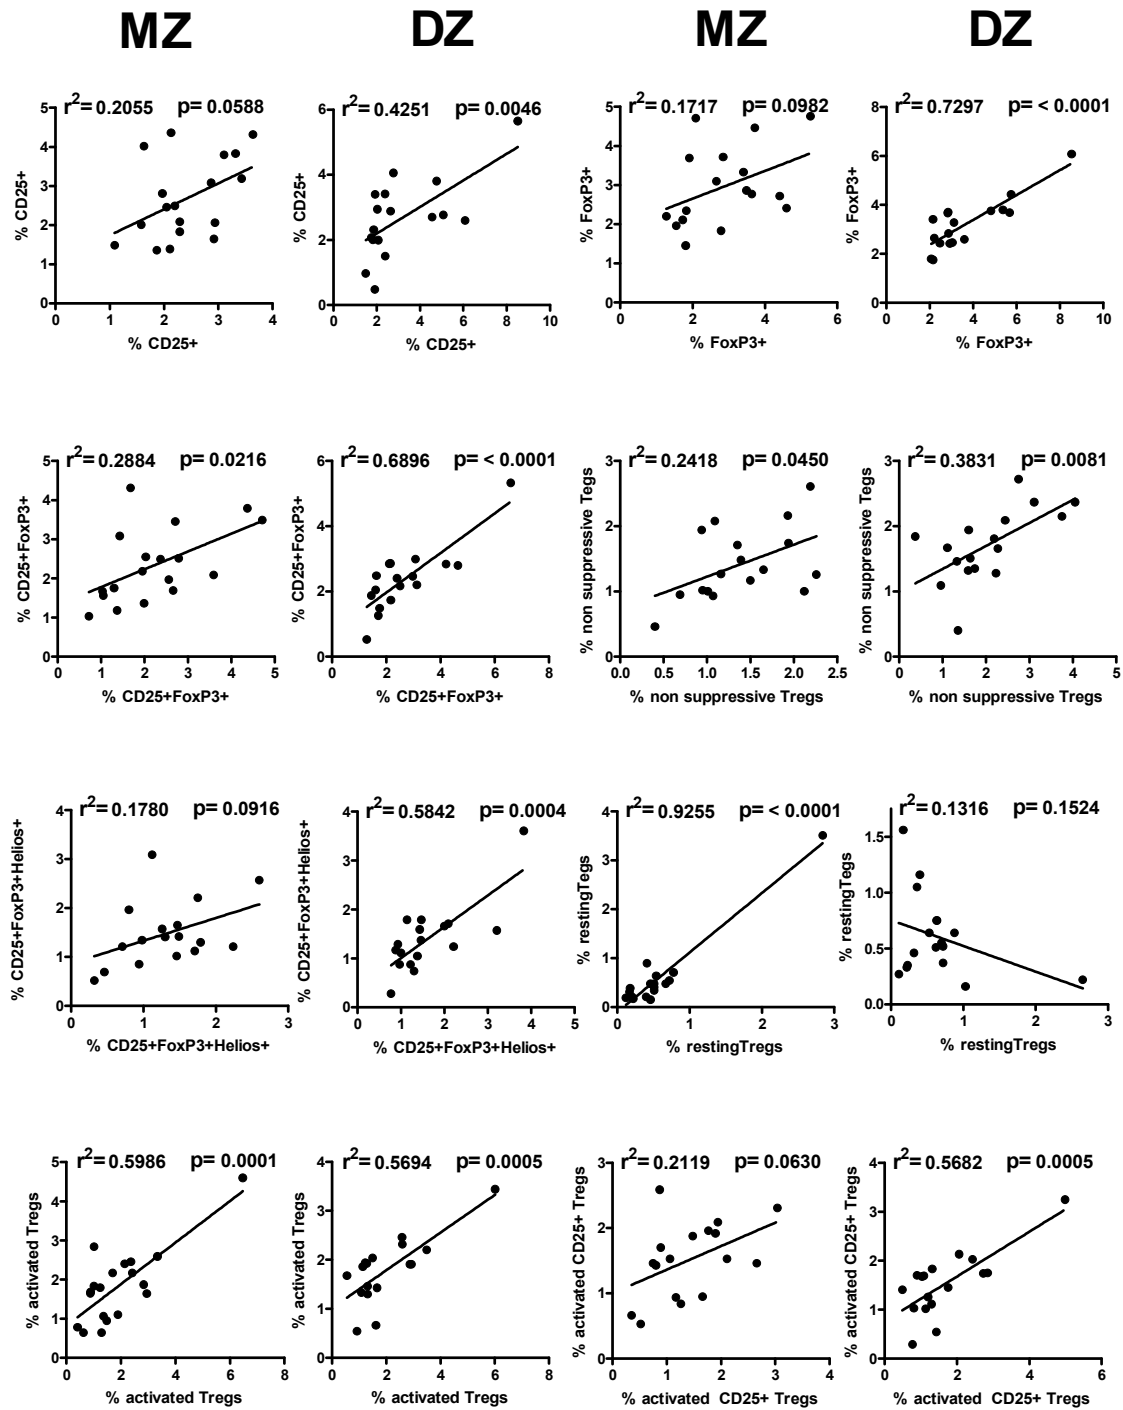

**Figure S2.** Correlation analysis for differentiation status of Tregs within CMV-seropositive twin pairs. Scatter plots are shown for CMV-seropositive concordant monozygotic (MZ) and dizygotic (DZ) pairs. Each symbol represents one twin pair.

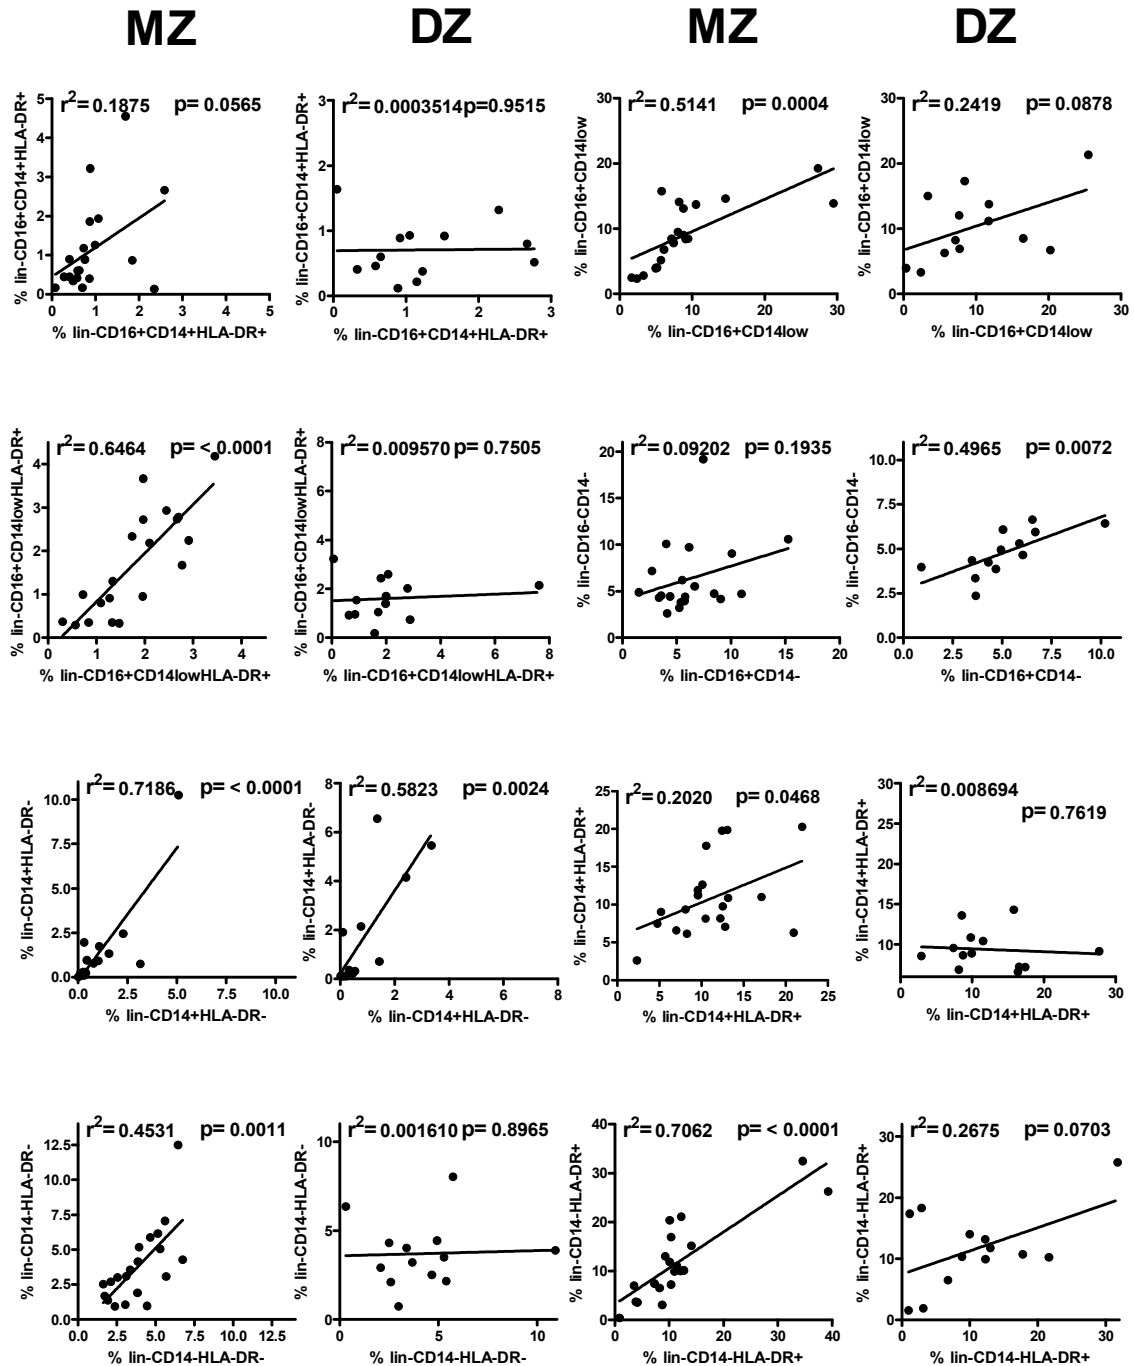

**Figure S3.** Correlation analysis for differentiation status of monocytes and MDSCs between CMV-seropositive co-twins. Scatter plots are shown for CMV-seropositive concordant monozygotic (MZ) and dizygotic (DZ) pairs. Each symbol represents one pair.

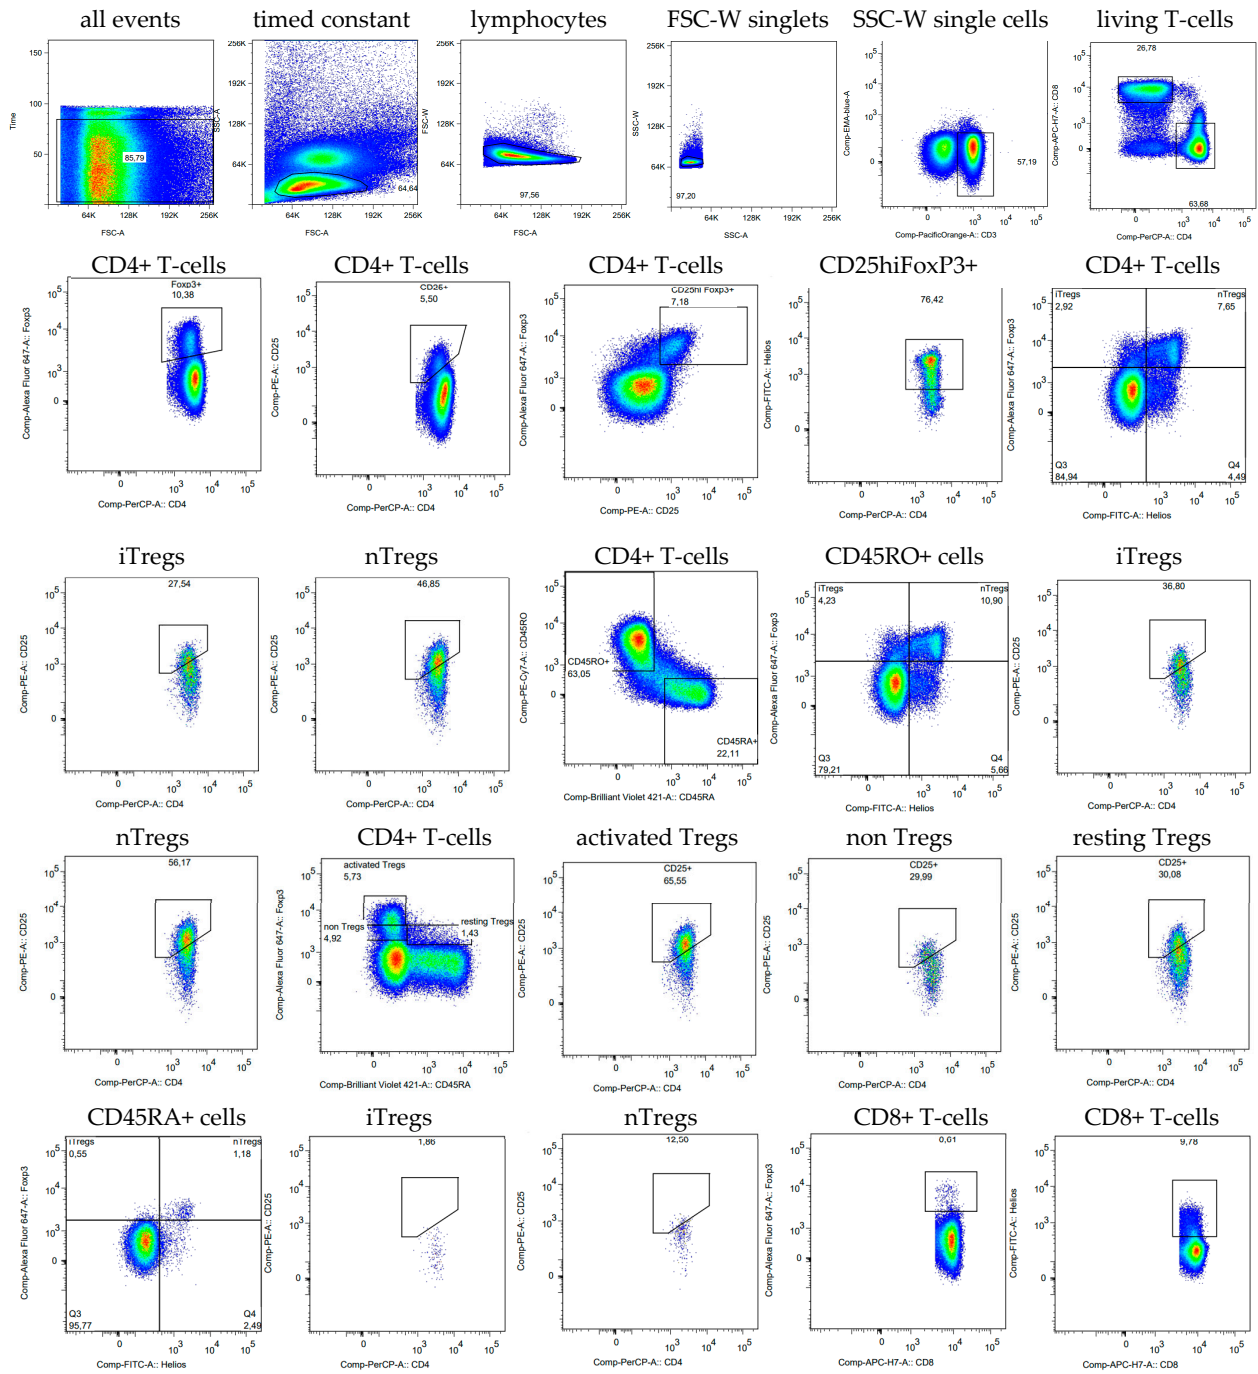

**Figure S4.** Treg panel gating strategy. Starting with all measured events various Treg phenotypes have been gated with the parental population named above each plot, here for a control sample.
